# Supplementary material
Source: PubMed Central journal article supplement (PMC8102326)

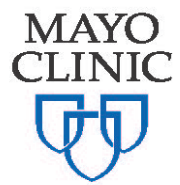

200 First Street SW  
Rochester, MN 55905  
(507) 284-3335  
**Scientific Publications**

*Rosemary Perry*

# Increased CV Risk

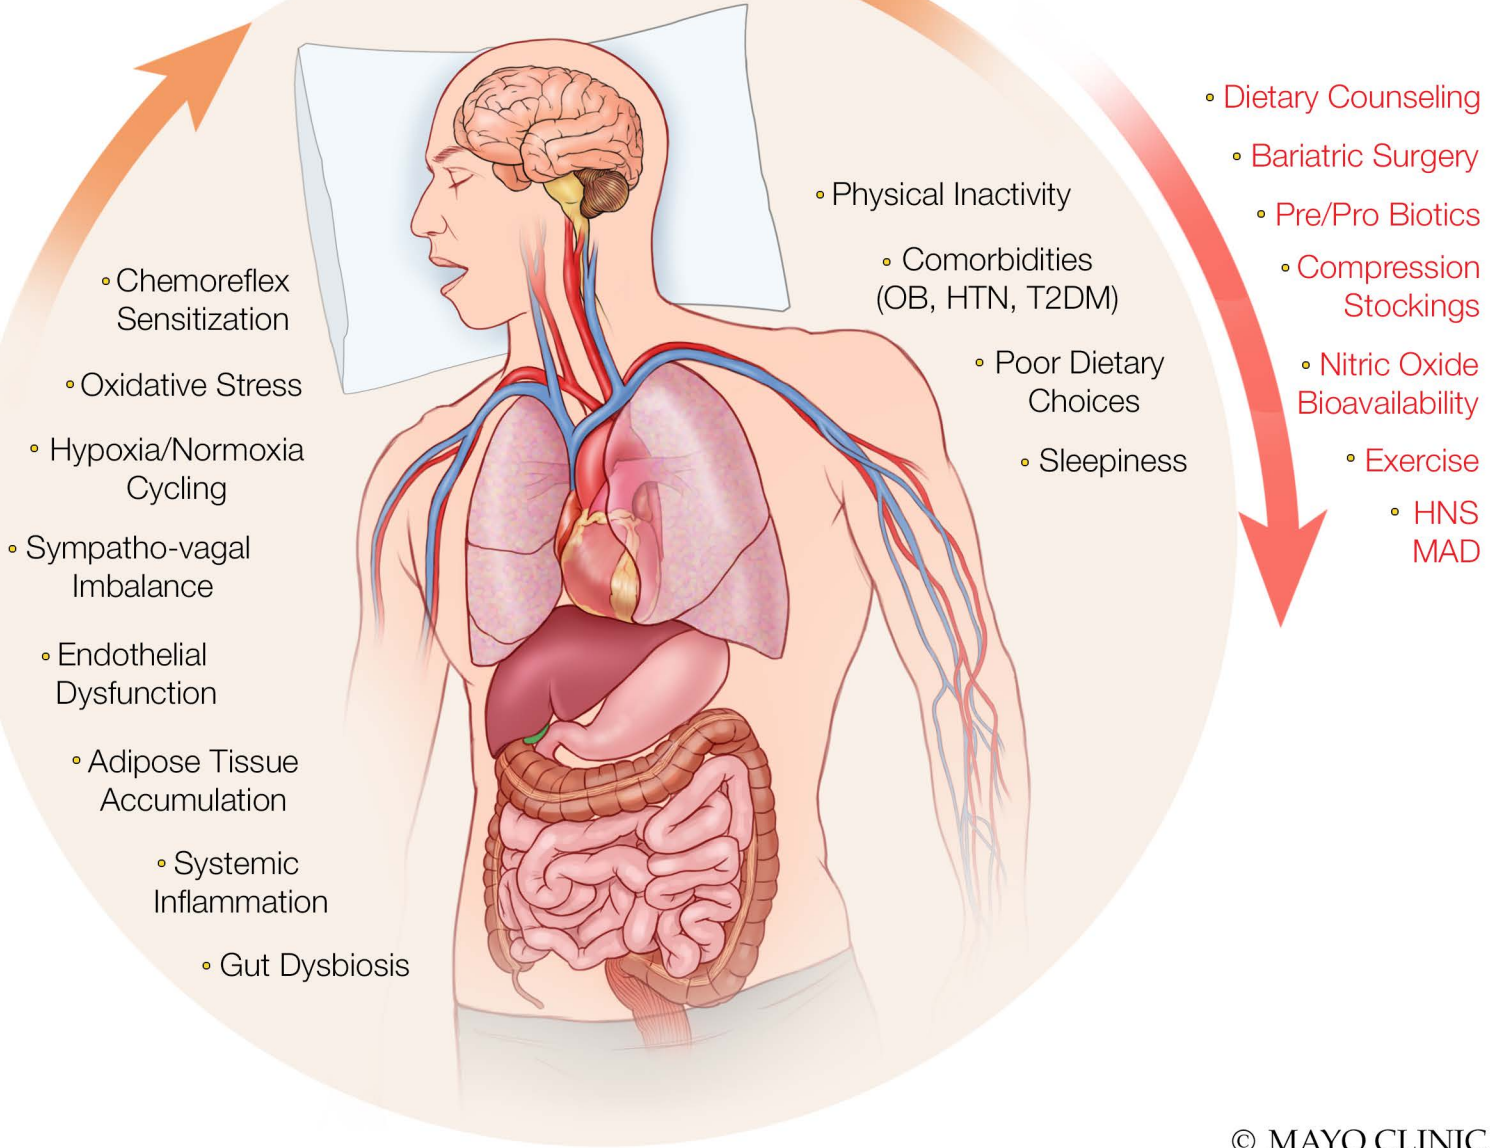

Supplement: NIHMS1677854-supplement-1.pdf [file NIHMS1677854-supplement-1.pdf]
